# Supplementary material
Source: Springer Nature journal article supplement (https://www.springermedizin.de/resource/supplementary/12958_2008_480_MOESM3_ESM.pdf/9568286)

Regular hCG

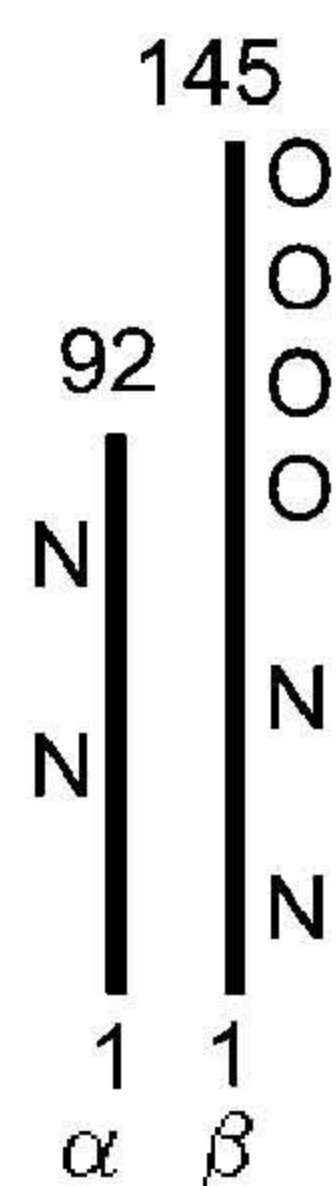

Hyperglycosylated hCG

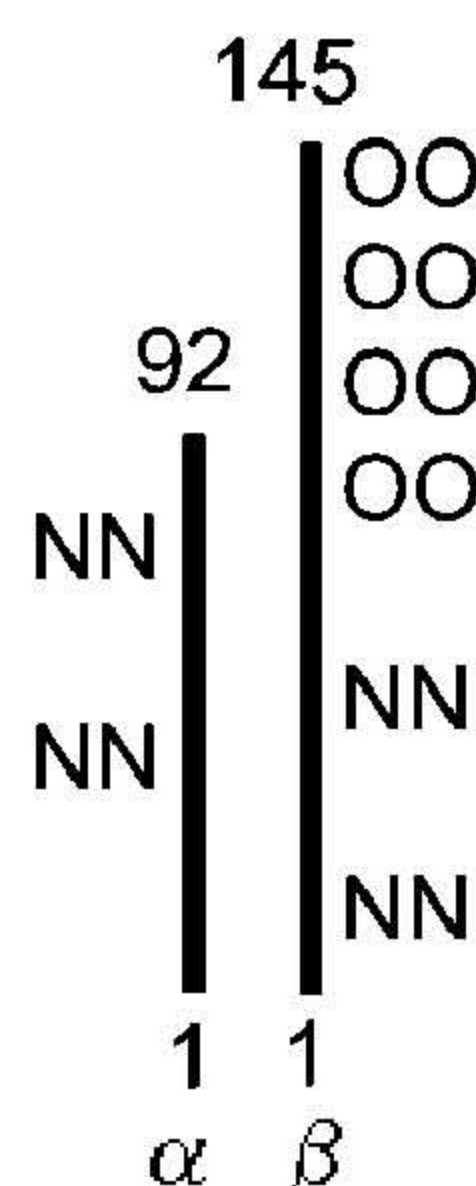

Nicked regular hCG

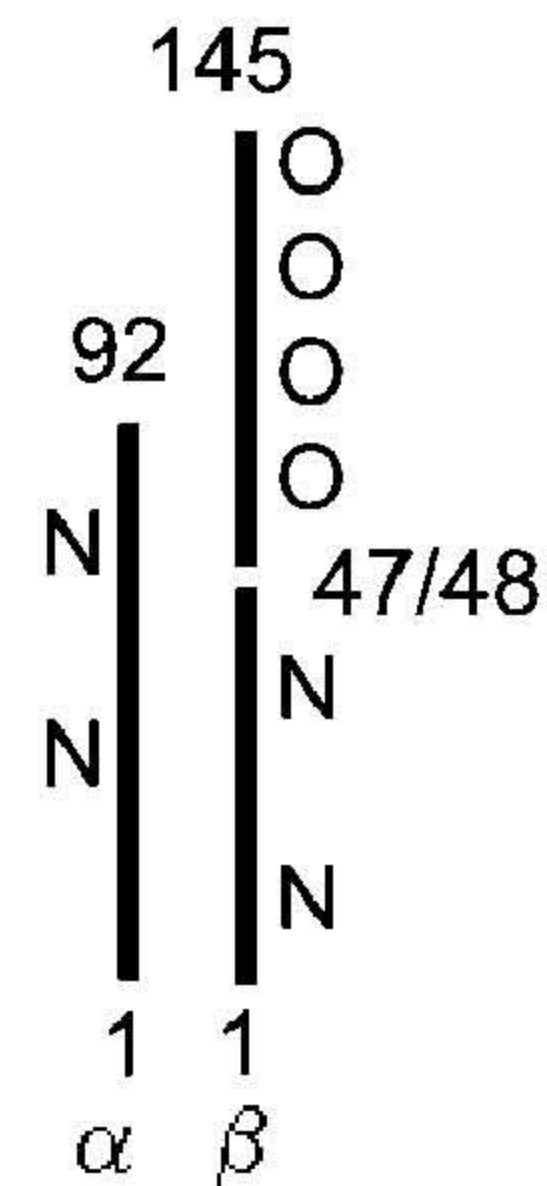

Nicked hyperglycosylated hCG

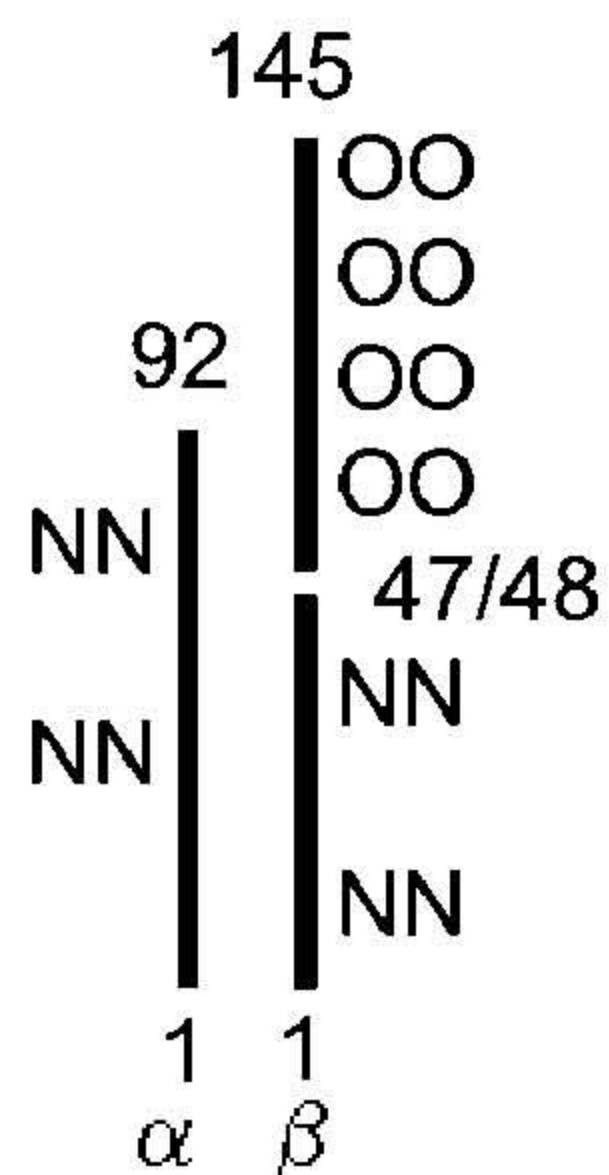Nicked regular hCG missing  $\beta$ CTP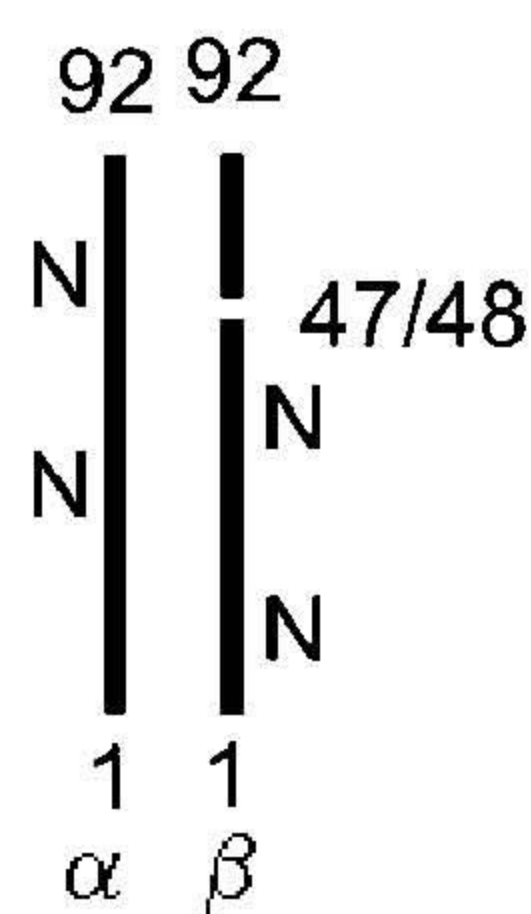Nicked hyperglycosylated hCG missing  $\beta$ CTP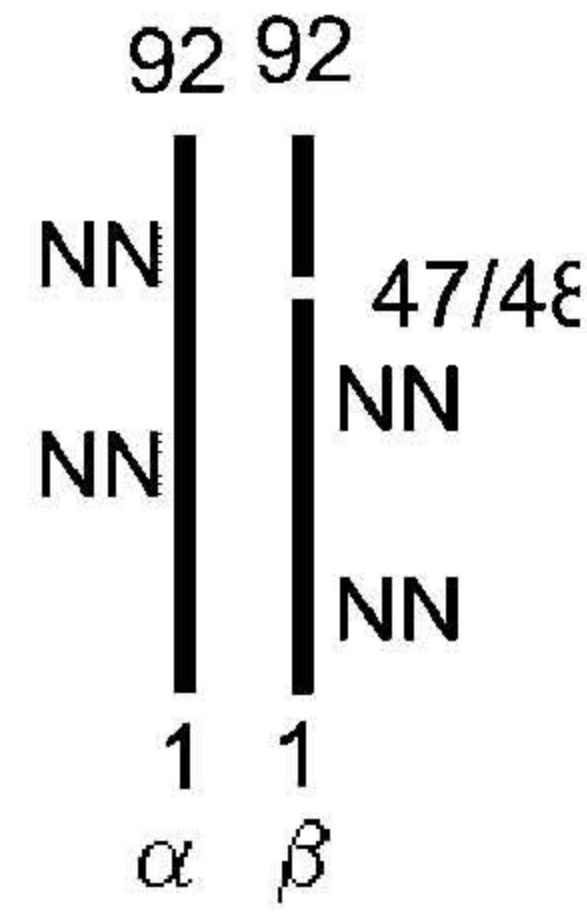hCG free  $\beta$ -subunit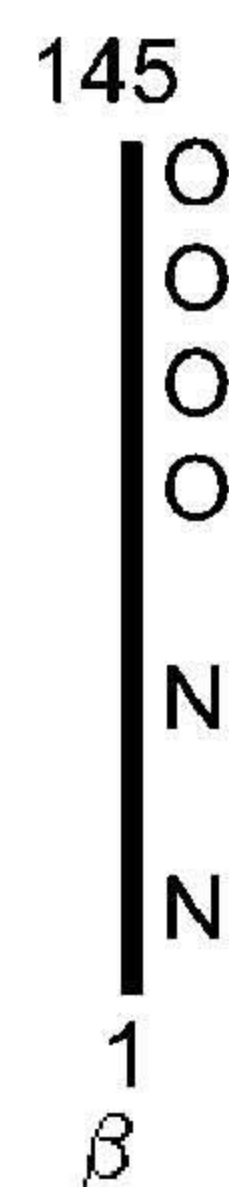Hyperglycosylated hCG free  $\beta$ 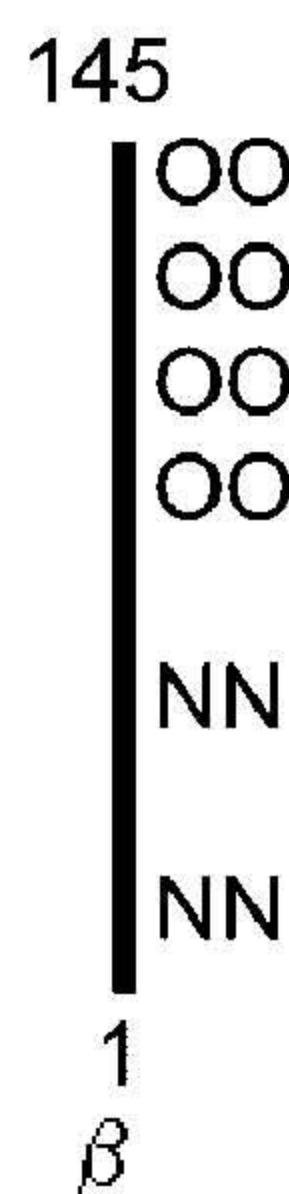Nicked hCG free  $\beta$ 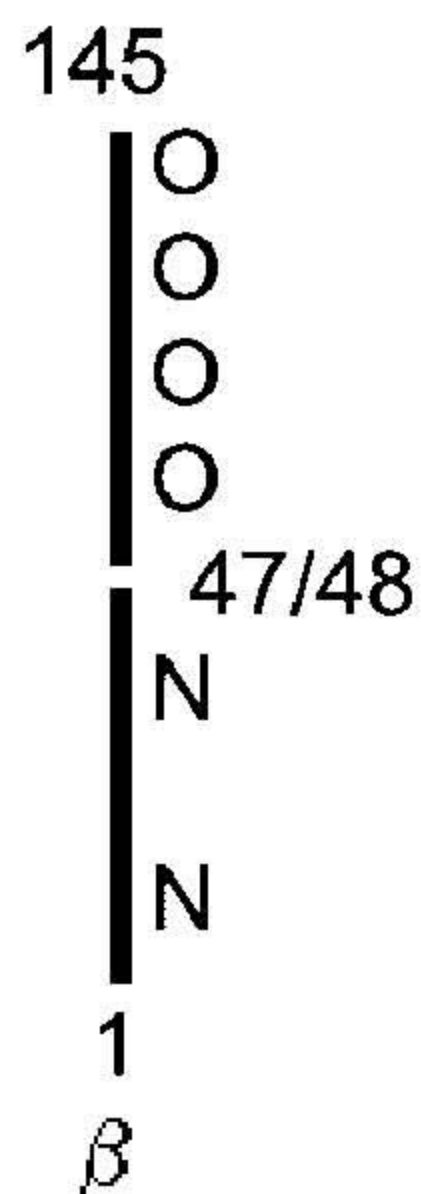Nicked hyperglycosylated hCG free  $\beta$ 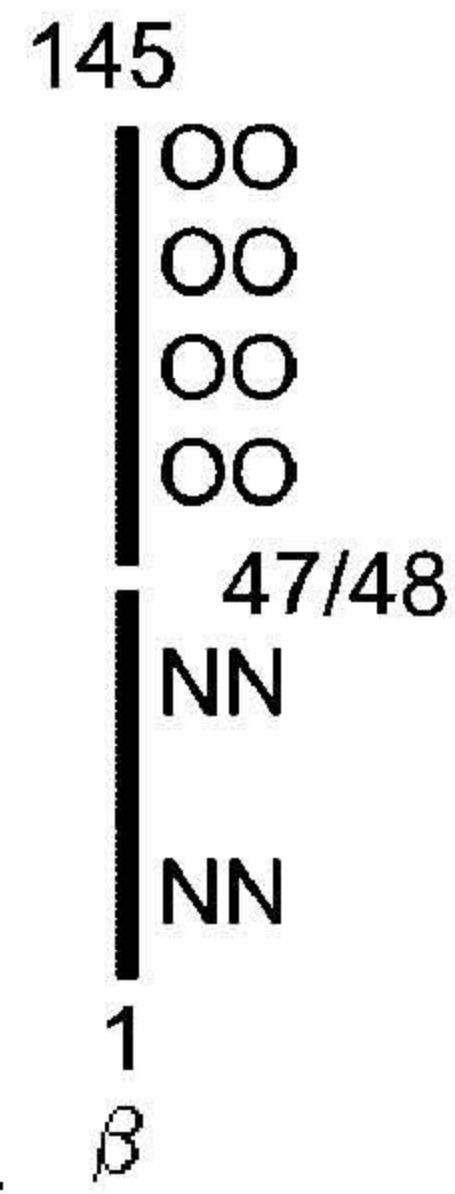Nicked hCG free  $\beta$ -subunit missing  $\beta$ CTP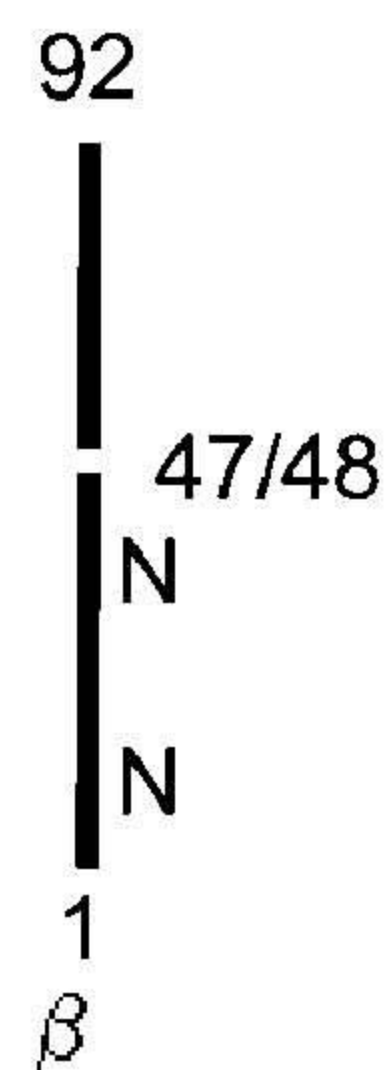Nicked hyperglycosylated hCG free  $\beta$  missing  $\beta$ CTP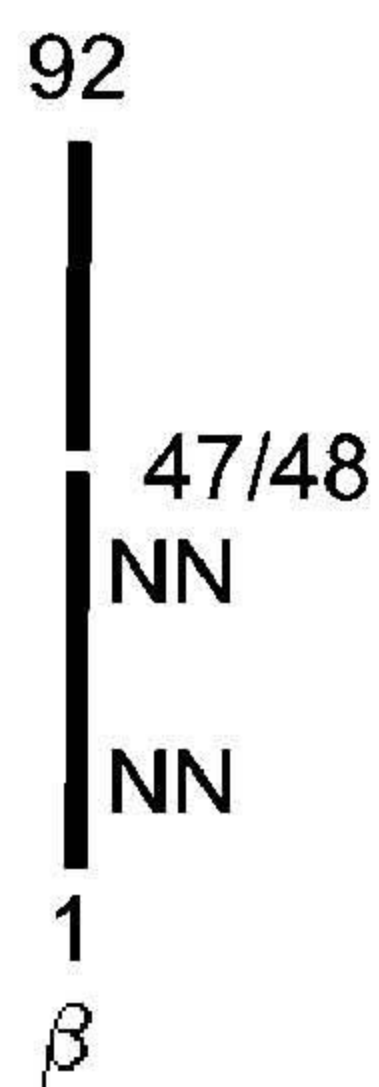 $\beta$ -subunit core fragment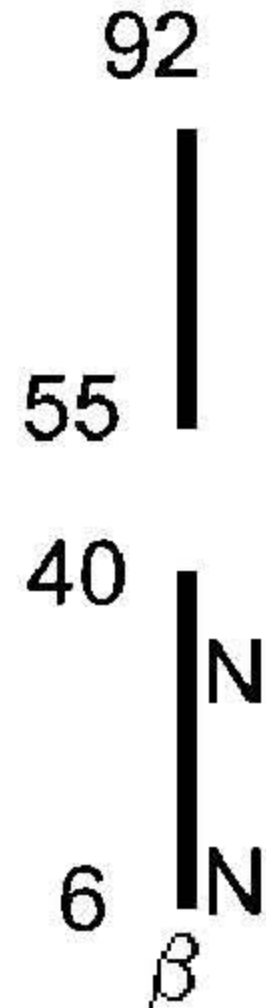Free  $\alpha$ -subunit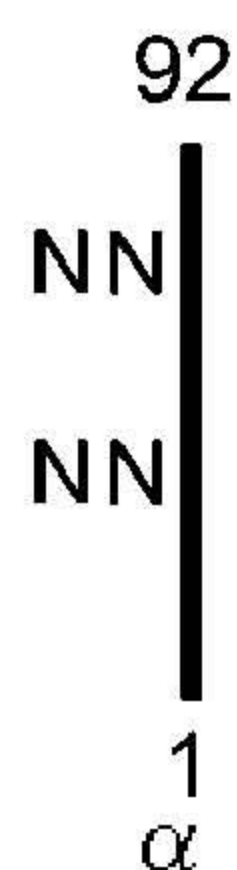O-glycosylated free  $\alpha$ -subunit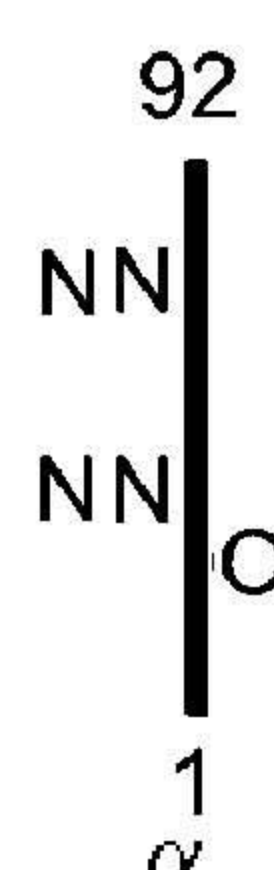

Supplement: MOESM3 [file 9568286]
